# Supplementary material for: Homeless Veterans’ Use of Peer Mentors and Effects on Costs and Utilization in VA Clinics
Source: Atypon-hosted journal article supplement (doi:10.1176/appi.ps.201600290), 2017-02-01
Supplement: appi.ps.201600290.ds001.pdf [file appi.ps.201600290.ds001.pdf]

## **Online Appendix**

### **Detailed Study Methods**

Patients eligible for the study did not include individuals living in Section 8/Housing and Urban Development-Veterans Administration Supportive Housing (HUD-VASH) units since they had stable housing and were no longer homeless based on the HUD definition of homeless. Veterans receiving intensive case management (e.g. mental health services for a serious persistent mental illness) at enrollment were also excluded since that level of engagement with VA care could dilute the peer effect compared with veterans not as engaged in care.

Sites were chosen due to their high volume of homeless patients. Two study sites were located in an east coast city and two sites were located in a west coast city. A total of 50 patients were randomized at PACT site 1; 56 patients, PACT site 2; 120 patients, H-PACT site 1; and 149 patients, H-PACT site 2. Randomization assignments were in sealed, masked envelopes that were opened by primary care staff at time of enrollment. Once assigned to a randomization arm, providers were not blinded to treatment since they discussed patient care issues with the peer mentors. All participants received \$20 gift cards upon completion of a baseline survey.

Training for peer mentors was based on the MISSION-Vet manual. MISSION services included exercises designed to promote recovery. Mentor training emphasized modules most relevant to primary care-based interventions (e.g., motivational interviewing, patient empowerment, enhancing self-efficacy, and negotiating for behavior change), and also covered interacting with PACT team members, navigating care within the VA system, placing limits and defining the scope of intervention in patient interactions, and handling emergencies. Research assistants at

each site received training on observing and monitoring peer mentor interactions to ensure ongoing study fidelity. Mentors met regularly with assigned patients and were also expected to be available for ad hoc contacts initiated by the study participants, so actual contact frequency was dictated by the care plan as well as patient preference. Mentors also participated in PACT/H-PACT team meetings and served as liaisons between the study participants and his/her primary care team. Each mentor was responsible for community-based follow-up for their assigned patients. Peer mentors were responsible for an average of 20 ( $\pm 18$ ) veterans (range 1-45) that varied by the length of their employment and the amount of hours they worked. Two female mentors were specifically matched to veterans of the same gender, and only one mentor saw veterans of the opposite sex. Not all peers were employed throughout the duration of the study.

Health care utilization outcomes included number of visits to primary care, specialty care, mental health/substance abuse, intensive program, homeless program, telephone, fee basis, inpatient admissions, ambulatory care sensitive conditions (ACSC) admissions, ED, ambulatory-care sensitive condition ED visits, and 30-day VA prescription drug fills.

**Table A1. Patient cohort baseline characteristics, N=375**

| Patient characteristics at baseline                        | Peer mentor<br>(N=195) |     | Usual care<br>(N=180) |     | $\chi^2$ /tes<br>t<br>statis<br>tic | Df  | Chi-<br>square<br>p-<br>value |
|------------------------------------------------------------|------------------------|-----|-----------------------|-----|-------------------------------------|-----|-------------------------------|
|                                                            | N                      | %   | N                     | %   |                                     |     |                               |
| <b>Characteristic</b>                                      |                        |     |                       |     |                                     |     |                               |
| <b>Type of primary care site</b>                           |                        |     |                       |     | .5                                  | 1   | .47                           |
| PACT <sup>a</sup>                                          | 52                     | 27% | 54                    | 30% |                                     |     |                               |
| H-PACT <sup>a</sup>                                        | 143                    | 73% | 126                   | 70% |                                     |     |                               |
| <b>Age (mean±SD)</b>                                       | 52.0±9.6               |     | 52.2±9.5              |     | t = .2                              | 373 | .88                           |
| <b>Gender</b>                                              |                        |     |                       |     | .5                                  | 1   | .50                           |
| Male                                                       | 188                    | 96% | 171                   | 95% |                                     |     |                               |
| Female                                                     | 7                      | 4%  | 9                     | 5%  |                                     |     |                               |
| <b>Race/Ethnicity</b>                                      |                        |     |                       |     | .7                                  | 4   | .95                           |
| White                                                      | 88                     | 45% | 78                    | 43% |                                     |     |                               |
| Black                                                      | 66                     | 34% | 66                    | 37% |                                     |     |                               |
| Hispanic                                                   | 8                      | 4%  | 9                     | 5%  |                                     |     |                               |
| Other <sup>b</sup>                                         | 33                     | 17% | 27                    | 15% |                                     |     |                               |
| <b>Months spent homeless in past 5<br/>years (mean±SD)</b> | 28.8±22.<br>6          |     | 27.3±21.<br>7         |     | t = -.7                             | 369 | .52                           |
| <b>Current marital status</b>                              |                        |     |                       |     | 9.2                                 | 2   | .01                           |
| Married                                                    | 10                     | 5%  | 8                     | 4%  |                                     |     |                               |
| Divorced/separated/widowed                                 | 78                     | 40% | 100                   | 56% |                                     |     |                               |
| Never married                                              | 107                    | 55% | 72                    | 40% |                                     |     |                               |
| <b>Housing Type</b>                                        |                        |     |                       |     | 4.8                                 | 4   | .30                           |

|                                                                             |                       |     |                      |     |              |     |     |
|-----------------------------------------------------------------------------|-----------------------|-----|----------------------|-----|--------------|-----|-----|
| Unsheltered                                                                 | 26                    | 13% | 24                   | 13% |              |     |     |
| Emergency Shelter                                                           | 44                    | 23% | 28                   | 16% |              |     |     |
| Transitional Housing                                                        | 60                    | 31% | 68                   | 38% |              |     |     |
| Other                                                                       | 65                    | 33% | 60                   | 34% |              |     |     |
| <b>Any Mental Health Condition</b>                                          | 157                   | 83% | 137                  | 78% | 1.3          | 1   | .25 |
| Depression                                                                  | 135                   | 70% | 118                  | 67% | .3           |     | .60 |
| Anxiety                                                                     | 123                   | 64% | 108                  | 61% | .4           |     | .55 |
| PTSD <sup>a</sup>                                                           | 91                    | 52% | 81                   | 48% | .6           |     | .45 |
| Bipolar Disorder                                                            | 39                    | 21% | 30                   | 18% | .7           |     | .42 |
| Schizophrenia                                                               | 19                    | 10% | 18                   | 10% | <.01         |     | .97 |
| <b>Chronic Conditions</b>                                                   |                       |     |                      |     |              | 1   |     |
| Emphysema/asthma/COPD <sup>a</sup>                                          | 34                    | 18% | 46                   | 26% | 3.5          |     | .06 |
| Hepatitis/cirrhosis                                                         | 51                    | 26% | 41                   | 23% | .4           |     | .51 |
| Diabetes                                                                    | 20                    | 11% | 20                   | 11% | <.1          |     | .83 |
| High blood pressure                                                         | 63                    | 33% | 62                   | 35% | .2           |     | .68 |
| Heart disease/angina/heart attack                                           | 18                    | 10% | 16                   | 9%  | <.1          |     | .89 |
| Seizures                                                                    | 20                    | 10% | 12                   | 7%  | 1.4          |     | .23 |
| Arthritis                                                                   | 87                    | 45% | 71                   | 41% | .7           |     | .41 |
| Stomach ulcers/digestion                                                    | 40                    | 21% | 30                   | 17% | 1.0          |     | .32 |
| <b>Physical health score (mean±SD)<sup>c</sup></b>                          | 3.2±1.1               |     | 3.2±1.2              |     | t = -.7      | 371 | .46 |
| <b>Total VA costs 6 months prior to randomization (mean±SD)<sup>a</sup></b> | \$15,632±<br>\$23,252 |     | \$12,57±<br>\$13,111 |     | t = -<br>1.6 | 311 | .11 |

<sup>a</sup> PACT, Patient Aligned Care Team; H-PACT, Homeless Patient Aligned Care Team; PTSD,

posttraumatic stress disorder; COPD, chronic obstructive pulmonary disease; VA, Department of

Veterans Affairs

<sup>b</sup> Other includes multi-racial patients, Asians, and unknown.

<sup>c</sup> Physical health score on a scale of 1-5, where 1= excellent.

**Table A2. Summary of peer mentor contacts over a six-month period, N=195**

| <b>Type of contact</b>                               | <b>Mean</b> | <b>SD</b> |
|------------------------------------------------------|-------------|-----------|
| Number of all contacts/patient                       | 5           | 8         |
| Number of in-person contacts/patient                 | 4           | 8         |
| Number of phone contacts/patient                     | 0           | 1         |
| Number of minutes/patient where topic was discussed: |             |           |
| Patient health/medication                            | 17          | 37        |
| Mental health                                        | 16          | 39        |
| Substance abuse                                      | 13          | 27        |
| Appointment reminders                                | 12          | 18        |
| Housing issues                                       | 26          | 43        |
| Basic needs                                          | 12          | 26        |
| Gaining work experience                              | 8           | 17        |
| Contacting VA benefits <sup>a</sup>                  | 12          | 22        |
| Social issues                                        | 4           | 40        |
| Total number of face-to-face minutes                 | 132         | 269       |
| Total number of phone minutes                        | 11          | 33        |
| Number of minutes documenting                        | 23          | 48        |
| Number of minutes in training                        | 4           | 15        |
| Number of minutes meeting with care team             | 2           | 6         |

<sup>a</sup> VA, Department of Veterans Affairs
